# Supplementary material
Source: MDPI journal article supplement (https://www.mdpi.com/2073-4395/12/7/1604)
Supplement: s1 [file s1]

**Table S1.** Effect of fertilization treatment and year on macronutrient concentration (g 100 g<sup>-1</sup> DW) in autumn.

| TREATMENT             | N                   | P         | K         | Ca        | Mg        | S         |
|-----------------------|---------------------|-----------|-----------|-----------|-----------|-----------|
| MIN <sup>1</sup>      | 1.40 a <sup>3</sup> | 0.085     | 0.299 b   | 2.86      | 0.475     | 0.084     |
| MOW                   | 1.10 b              | 0.076     | 0.452 a   | 2.57      | 0.378     | 0.080     |
| SS                    | 1.42 a              | 0.088     | 0.506 a   | 3.18      | 0.452     | 0.105     |
| <i>Significance</i>   | *                   | <i>ns</i> | *         | <i>ns</i> | <i>ns</i> | <i>ns</i> |
| YEAR                  |                     |           |           |           |           |           |
| 2020                  | 1.81                | 0.088     | 0.541     | 2.81      | 0.466     | 0.093     |
| 2021                  | 0.960               | 0.079     | 0.297     | 2.93      | 0.404     | 0.086     |
| <i>Significance</i>   | **                  | <i>ns</i> | **        | <i>ns</i> | <i>ns</i> | *         |
| <i>Year*treatment</i> | <i>ns</i>           | <i>ns</i> | <i>ns</i> | <i>ns</i> | <i>ns</i> | <i>ns</i> |

<sup>1</sup>MIN: mineral; MOW: municipal organic waste compost; SS: sewage sludge compost. <sup>2</sup> ns, \*, \*\*: effect not significant or significant at  $P \leq 0.05$  and  $P \leq 0.01$ , respectively. <sup>3</sup> Means followed by the same letter are not statistically different ( $P \leq 0.05$ ).
